# Supplementary material for: Evaluation of chromatin accessibility in prefrontal cortex of individuals with schizophrenia
Source: PubMed Central journal article supplement (PMC6081462; doi:10.1038/s41467-018-05379-y), 2018-08-07
Supplement: 41467_2018_5379_MOESM3_ESM.pdf [file 41467_2018_5379_MOESM3_ESM.pdf]

## **Description of Additional Supplementary Files**

**Supplementary Data 1:** Differential chromatin analysis results for age at death.

**Supplementary Data 2:** GREAT analysis of differentially accessible peaks for age at death (9,396 peaks, 20% FDR)

**Supplementary Data 3:** Differential chromatin analysis results for post-mortem interval

**Supplementary Data 4:** GREAT analysis of differentially accessible peaks for post-mortem interval (2,328 peaks, 20% FDR)

**Supplementary Data 5:** Differential chromatin analysis results for diagnosis (control vs schizophrenia).

**Supplementary Data 6:** GREAT analysis of differentially accessible peaks for diagnosis (control vs schizophrenia, top 1000 peaks).

**Supplementary Data 7:** Meta-data variables associated with samples used in this study.
